# Supplementary material for: Untargeted Metabolomics Studies of H9c2 Cardiac Cells Submitted to Oxidative Stress, β-Adrenergic Stimulation and Doxorubicin Treatment: Investigation of Cardiac Biomarkers
Source: PubMed Central journal article supplement (PMC9277393; doi:10.3389/fmolb.2022.898742), 2022-06-29
Supplement: DataSheet1.pdf [file DataSheet1.pdf]

## *Supplementary Material*

### **Untargeted Metabolomics Studies of H9c2 Cardiac Cells Submitted to Oxidative Stress, $\beta$ -Adrenergic Stimulation and Doxorubicin Treatment: Investigation of Cardiac Biomarkers**

**Monica Força Lima<sup>1,2</sup>, Alan Gonçalves Amaral<sup>2</sup>, Isabela Aparecida Moretto<sup>3</sup>, Franckson Jhonne Torres Neves Paiva da Silva<sup>3</sup>, Flávia Oliveira Borges Pereira<sup>3</sup>, Coral Barbas<sup>1</sup>, Aline Mara dos Santos<sup>3</sup>, Ana Valéria Colnaghi Simionato<sup>2,4</sup>, Francisco Javier Rupérez<sup>1\*</sup>**

<sup>1</sup> Center for Metabolomics and Bioanalysis (CEMBIO), Facultad de Farmacia, Universidad San Pablo-CEU, CEU Universities, Boadilla del Monte, 28660, Madrid, Spain;

<sup>2</sup> Department of Analytical Chemistry, Institute of Chemistry, University of Campinas, 13083-970, Campinas - SP, Brazil;

<sup>3</sup> Department of Structural and Functional Biology, Institute of Biology, University of Campinas, 13083-970, Campinas - SP, Brazil;

<sup>4</sup> National Institute of Science and Technology in Bioanalytics (INCTBio).

\* Corresponding authors: e-mail adress: [ruperez@ceu.es](mailto:ruperez@ceu.es) (Francisco Javier Rupérez) and [alinems@unicamp.br](mailto:alinems@unicamp.br) (Aline Mara dos Santos)

Supplementary Material  
1 **Supplementary Figures**

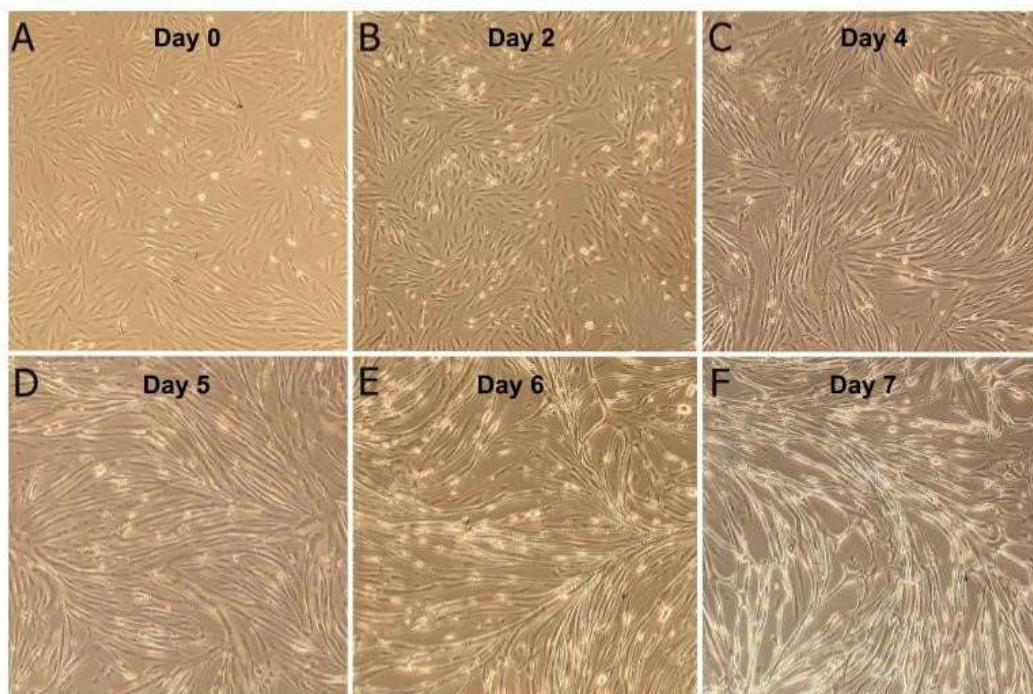

**Supplementary Figure 1:** Phase-contrast images from H9c2 cells during the differentiation process. The images were captured with a 100x magnification, during 7 consecutive days as indicated in the sequence from A to F. The differentiated H9c2 cardiomyocytes are morphologically elongated and multinucleated, while the undifferentiated cells have a polygonal shape.

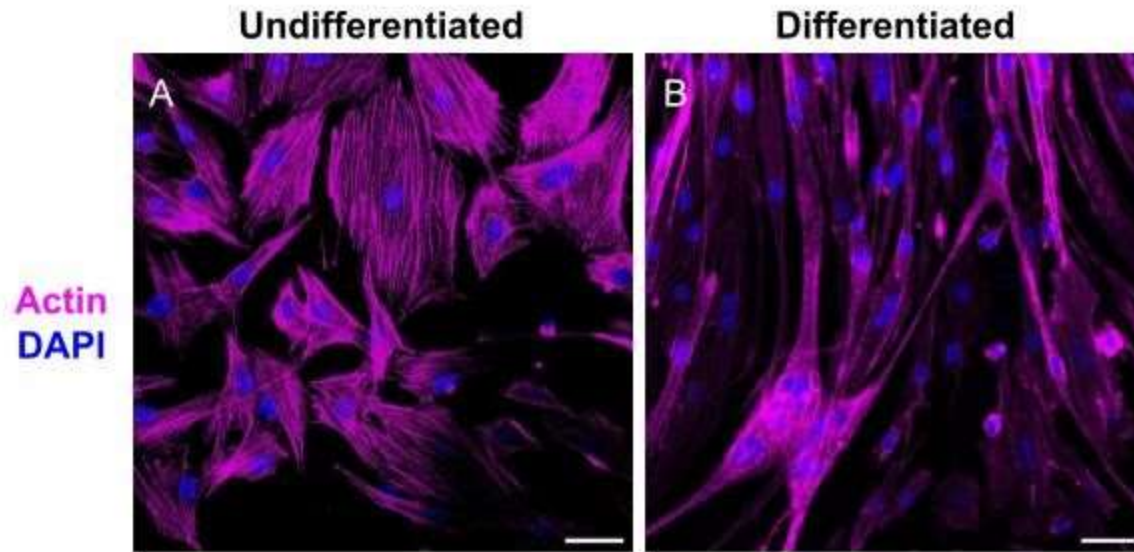

**Supplementary Figure 2:** Immunofluorescence images of H9c2 cardiomyocytes. A. Super resolution image of undifferentiated myocytes shows evenly distributed polygonal shaped cells. B. After differentiation, myocytes became multinucleated and elongated. Magenta: actin; Blue: core. Scale bar = 50  $\mu$ m.

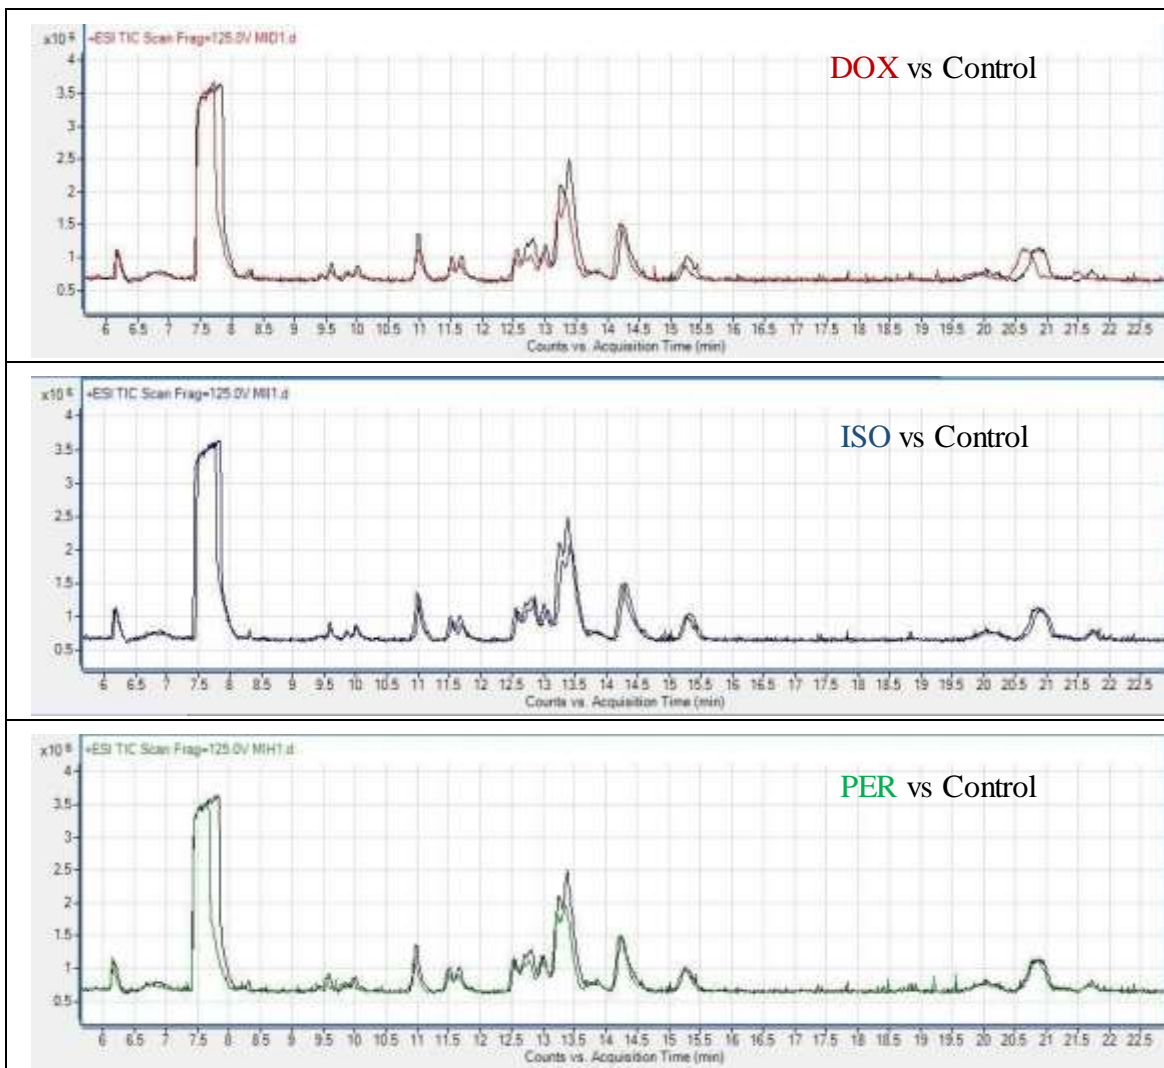

**Supplementary Figure 3.** Total ion electropherogram (TIE) obtained from the cellular extract of H9c2 cells that were submitted to DOX, ISO, and PER and analyzed by CE-MS in the positive ionization mode.

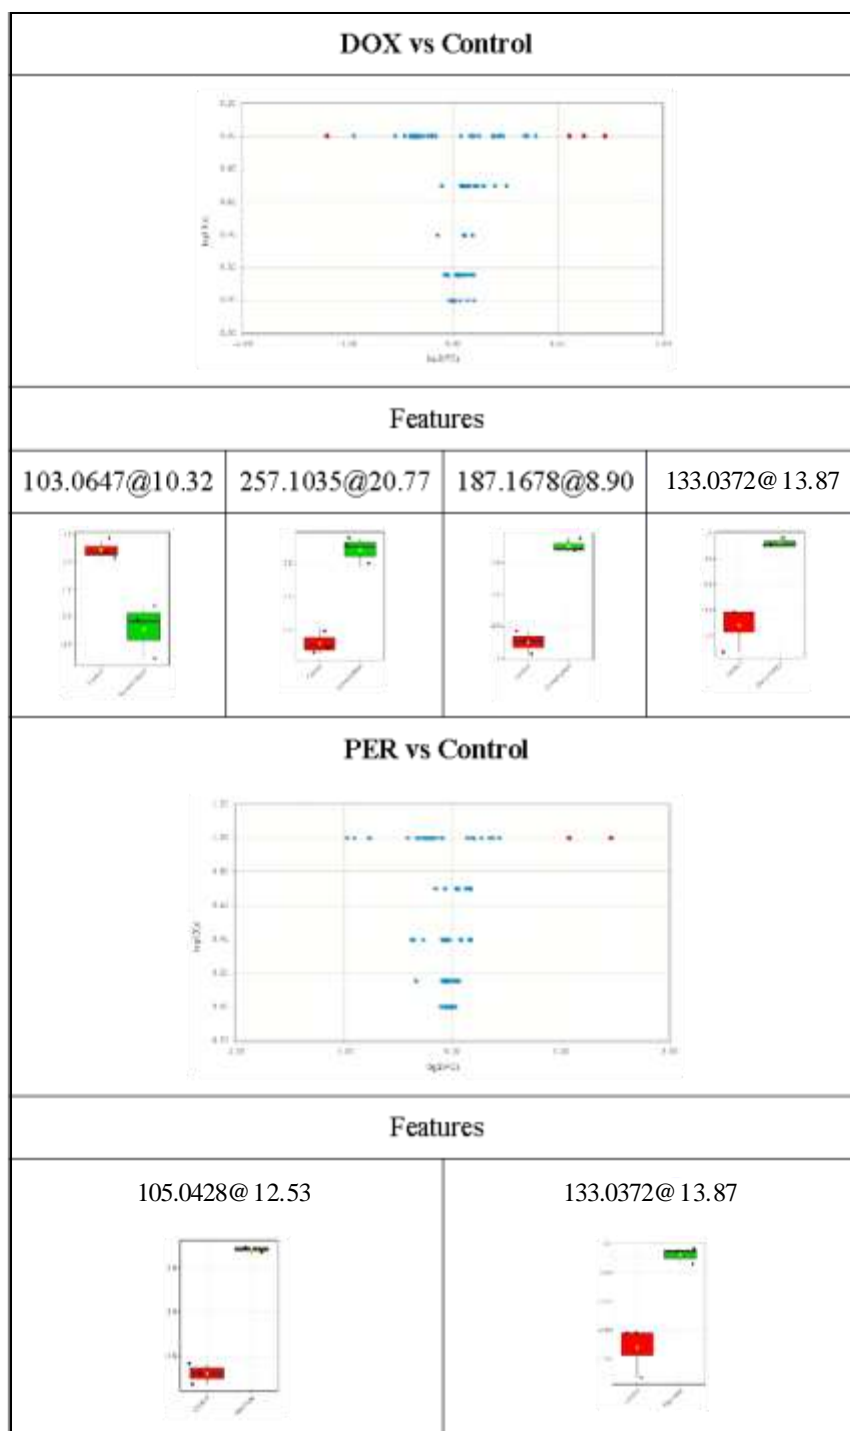

**Supplementary Figure 4:** Important molecular features selected by volcano plot with fold change threshold (x) 2 and t-tests threshold (y) 0.1 obtained from H9c2 cell extract in the untargeted metabolomic evaluation by CE-MS carried out in the positive ionization mode.

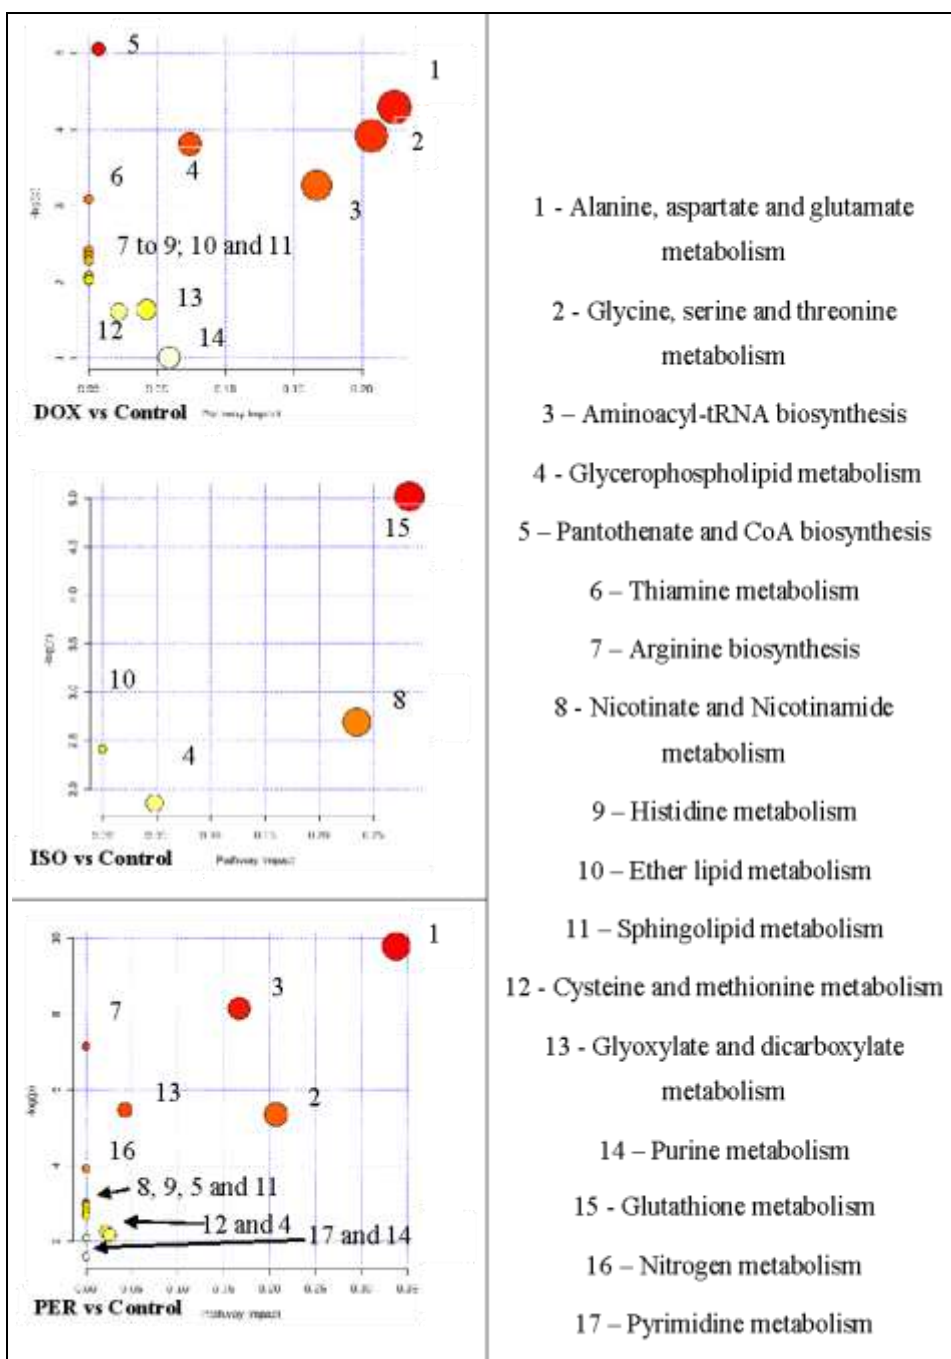

**Supplementary Figure 5:** Pathway analysis for the comparison of the three treatments applied to H9c2 cells. Annotations: Pathway analysis carried out in MetaboAnalyst 4.0, Pathway library Mus musculus (KEGG), Pathway analysis algorithms were “Hypergeometric Test” for Over Representation Analysis and “Relative-betweeness Centrality” for Pathway Topology Analysis.
